# Supplementary material for: Layer-by-layer epitaxy of multi-layer MoS2 wafers
Source: PubMed Central journal article supplement (PMC9232293; doi:10.1093/nsr/nwac077), 2022-04-21
Supplement: nwac077_supplemental_file.pdf [file nwac077_supplemental_file.pdf]

Supplementary Information for

## **Layer-by-Layer Epitaxy of Multilayer MoS<sub>2</sub> Wafers**

Qinqin Wang<sup>1,2†</sup>, Jian Tang<sup>1,2†</sup>, Xiaomei Li<sup>1,2</sup>, Jinpeng Tian<sup>1,2</sup>, Jing Liang<sup>4</sup>, Na Li<sup>1,3</sup>, Depeng Ji<sup>3</sup>, Lede Xian<sup>3</sup>, Yutuo Guo<sup>1,2</sup>, Lu Li<sup>1,2</sup>, Qinghua Zhang<sup>1,2</sup>, Yanbang Chu<sup>1,2</sup>, Zheng Wei<sup>1,2</sup>, Yanchong Zhao<sup>1,2</sup>, LuoJun Du<sup>1</sup>, Hua Yu<sup>1,3</sup>, Xuedong Bai<sup>1,2</sup>, Lin Gu<sup>1,2</sup>, Kaihui Liu<sup>4</sup>, Wei Yang<sup>1,2</sup>, Rong Yang<sup>1,2,3</sup>, Dongxia Shi<sup>1,2</sup> & Guangyu Zhang<sup>1,2,3\*</sup>

<sup>1</sup> Beijing National Laboratory for Condensed Matter Physics and Institute of Physics, Chinese Academy of Sciences, Beijing 100190, China

<sup>2</sup> School of Physical Sciences, University of Chinese Academy of Sciences, Beijing 100190, China

<sup>3</sup> Songshan Lake Materials Laboratory, Dongguan 523808, China

<sup>4</sup> Collaborative Innovation Center of Quantum Matter and School of Physics, Peking University, Beijing 100871, China

† Authors contribute equally to this work.

\* Corresponding author. Email: gyzhang@iphy.ac.cn

### **Contents:**

PART 1: Additional Discussions on the Growth and Results

PART 2: Additional Characterization Data and Illustrations

PART 3: References

## PART 1: Additional Discussions on the Growth and Results

### I: Energetics of layer-dependent MoS<sub>2</sub> on sapphire

Generally, three scenarios are used to describe the epitaxial thin film growth on a substrate: I) Frank-van der Merwe (FM) growth mode (2D growth mode); II) Volmer-Weber (VW) growth mode (3D growth mode); and III) Stranski-Kranstanov growth mode (initially 2D, after a critical thickness, it evolves to 3D growth mode). Regarding thermodynamics, these different modes are governed by three thermodynamic quantities, i.e. the free energy per unit area at the overlayer-vacuum interface ( $\gamma_o$ ), the overlayer-substrate interface ( $\gamma_i$ ), and the substrate-vacuum interface ( $\gamma_s$ ). According to criteria from E. Bauer & J. H. van der Merwe<sup>1</sup>, if  $\Delta\gamma = \gamma_o + \gamma_i - \gamma_s < 0$ , the growth mode is 2D; and if  $\Delta\gamma \geq 0$ , the growth mode is 3D. Where  $\Delta\gamma$  can be understood as the energy cost per unit area for the lateral growth of the overlayer (see Fig. S1a).

For free-standing MoS<sub>2</sub>, now we consider the case of growing an additional layer on (N-1)L-MoS<sub>2</sub>. As for free-standing MoS<sub>2</sub>, the interfacial energy  $\gamma_i = 0$ , the above energy criteria is simply reduced to the surface energy difference between NL-MoS<sub>2</sub> and (N-1)L-MoS<sub>2</sub>. According to previous studies<sup>2</sup>, the surface energy ( $\gamma_N$ ) increases with the number of layers (N) from  $\sim 0.23$  J/m<sup>2</sup> (N=1) to  $\sim 0.26$  J/m<sup>2</sup> (N>10, bulk). As  $\gamma_{N-1} < \gamma_N$ , thus  $\Delta\gamma > 0$ , suggesting that this process is thermodynamically unfavorable. Our DFT calculations also confirm such results (see Fig. S1d).

To overcome this limitation, one expected route is to utilize the surface proximity effect by putting NL-MoS<sub>2</sub> on substrate with high surface energy. Since the surface energy of sapphire (0001) is very high,  $\sim 3.3$  J/m<sup>2</sup>,<sup>3</sup> we now look at the NL-MoS<sub>2</sub>/sapphire system from DFT calculations. DFT calculations are carried out with the Vienna *ab initio* Simulation Package (VASP)<sup>4</sup>. The projector augmented wave (PAW) method<sup>5</sup> and generalized gradient approximation with Perdew, Burke and Ernzerhof type of (GGA-PBE) pseudopotentials<sup>6</sup> are used.

We can adapt the above criteria to evaluate the energetics of 2D versus 3D growth of MoS<sub>2</sub> on sapphire. For the growth of monolayer MoS<sub>2</sub> on sapphire, we can use the same energy criteria  $\Delta\gamma$  as defined above. However, for the growth of the N<sup>th</sup> layer on N-1 layer, we need to rewrite the energy criterion as:

$$\Delta\gamma_N = \gamma_{oN} + \gamma_{iN} - (\gamma_{oN-1} + \gamma_{iN-1}), \quad (1)$$

where  $\gamma_{o\alpha}$  is the surface energy of the  $\alpha$ -layer MoS<sub>2</sub> on sapphire and  $\gamma_{i\alpha}$  is the interfacial energy at the  $\alpha$ -layer MoS<sub>2</sub> - sapphire interface. This is because now the bare region, or the “substrate”, becomes the (N-1)-layer MoS<sub>2</sub> on sapphire (see Fig. S1b).

We can use the total energy of the N/(N-1)-layer MoS<sub>2</sub> on sapphire systems to calculate  $\Delta\gamma_N$ . As shown in Fig. S1b, the total energy per unit area of N-layer MoS<sub>2</sub> on sapphire can be written as:

$$E_N = E_{sapphire}^{bulk} d + N E_{MoS_2}^{bulk} + \gamma_{oN} + \gamma_{iN} + \gamma_s, \quad (2)$$

where  $E_{sapphire}^{bulk}$  and  $E_{MoS_2}^{bulk}$  are the total energy of bulk sapphire per unit thickness and bulk MoS<sub>2</sub> per layer, respectively;  $d$  is the thickness of the sapphire substrate; and  $\gamma_s$  is the surface energy of the other surface of sapphire without MoS<sub>2</sub>. Similarly, we can write down the total energy per unit area of (N-1)-layer MoS<sub>2</sub> on sapphire as:

$$E_{N-1} = E_{sapphire}^{bulk} d + (N-1) E_{MoS_2}^{bulk} + \gamma_{oN-1} + \gamma_{iN-1} + \gamma_s. \quad (3)$$

From Eqn. (1-3), we have

$$\Delta\gamma_N = E_N - E_{N-1} - E_{MoS_2}^{bulk}. \quad (4)$$

The layer-dependent relative energies  $\Delta\gamma_N$  of growing the  $N^{\text{th}}$  layer MoS<sub>2</sub> on (N-1)L-MoS<sub>2</sub>/sapphire calculated with DFT are shown in Fig. S1c. From these data, we can see that  $\Delta\gamma < 0$  criterion is satisfied when  $N=1, 2$ , while  $\Delta\gamma$  is close to 0 when  $N=3$ , and  $\Delta\gamma > 0$  when  $N>3$ . These results suggest that the epitaxial growth of an additional MoS<sub>2</sub> layer on 1L-MoS<sub>2</sub>/sapphire (to produce bilayer) or 2L-MoS<sub>2</sub>/sapphire (to produce trilayer) follows the 2D growth mode; for epitaxy on thicker MoS<sub>2</sub>, the growth evolves from 2D to 3D at a critical thickness, e.g.,  $N=3$ .

From these results shown in Fig. S1(c-d), we can clearly see the behaviors of additional layer of MoS<sub>2</sub> grown on freestanding (N-1)L-MoS<sub>2</sub> and (N-1)L-MoS<sub>2</sub>/sapphire are distinctly different for small  $N$ , although both cases are homoepitaxy. While the layer-by-layer homoepitaxial growth of MoS<sub>2</sub> in the free-standing scenario is energetic unfavorable, such 2D growth is energetic favorable for the first few layers of MoS<sub>2</sub> grown on sapphire surface, due to the proximity effect of the sapphire surface that has a very high surface energy.

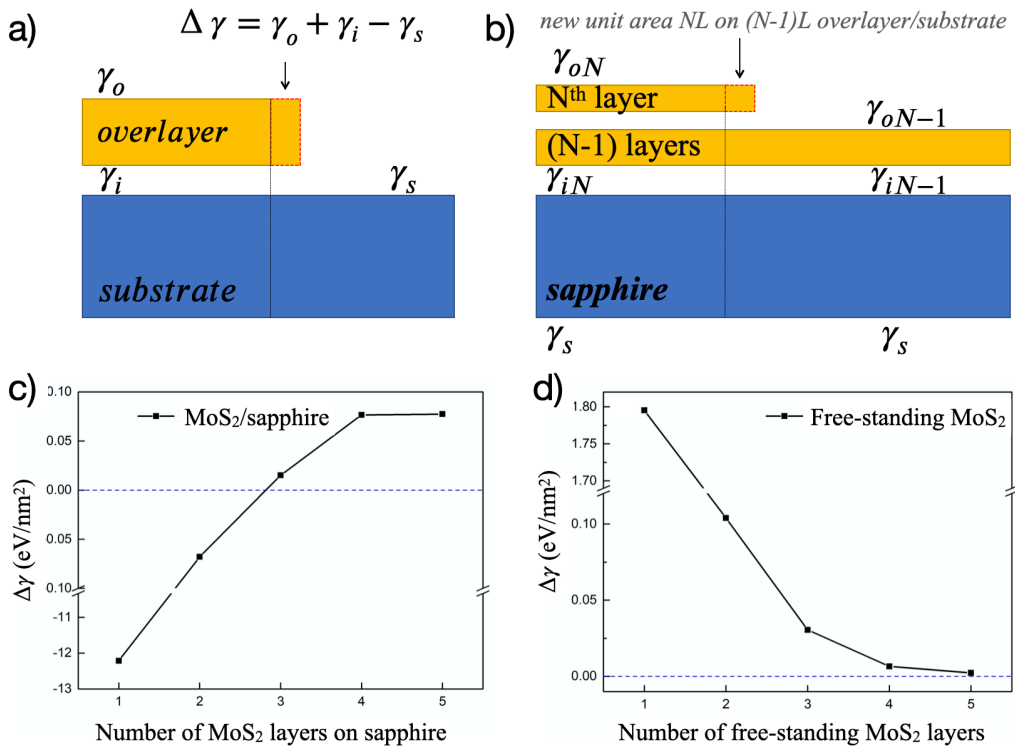

**Fig. S1 Energetics of layer-dependent MoS<sub>2</sub> with and without sapphire substrate.** (a) Model of an overlayer grown on a substrate. (b) Model of  $N^{\text{th}}$  monolayer epitaxially grown on (N-1)L-MoS<sub>2</sub>/sapphire. (c-d) The calculated layer-dependent relative surface/interfacial energies of MoS<sub>2</sub>/sapphire and free-standing MoS<sub>2</sub>.

## II: Kinetics of the layer-by-layer growth of MoS<sub>2</sub>

Above analysis provides a thermodynamic validation of layer-by-layer growth of MoS<sub>2</sub> on sapphire. Here, we further discuss in view of kinetics. Generally, the epitaxy (such as MBE) of a complete thin layer on substrate starts from multiple nucleations. These nuclei grow into larger domains at their edges (edge growth) and eventually coalesce into a complete film. In the present case, the general description of (N+1)<sup>th</sup>L-MoS<sub>2</sub> on NL-MoS<sub>2</sub>/sapphire is illustrated in the below model (Fig. S2).  $N=0$  ( $N>0$ ) corresponds heteroepitaxy (homoepitaxy).

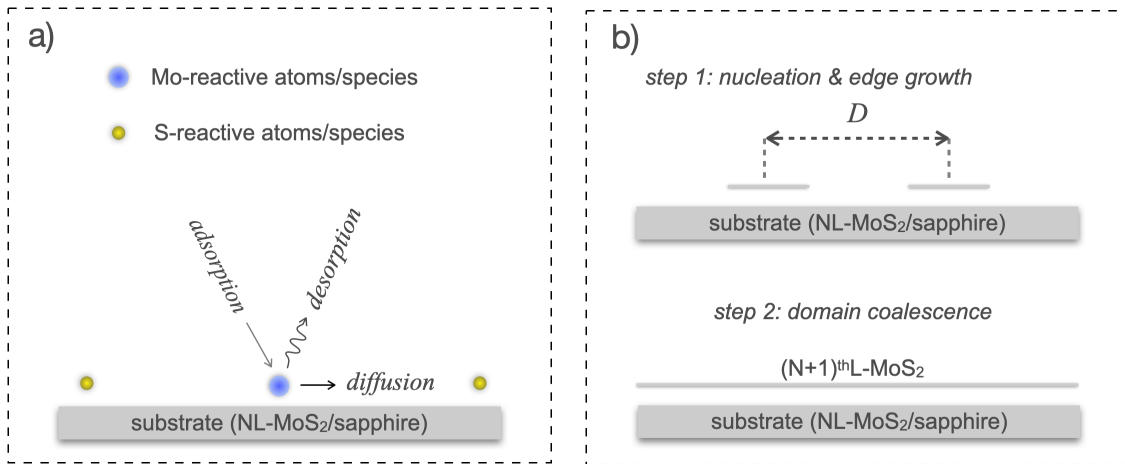

**Fig. S2 Kinetics and model for layer-by-layer growth MoS<sub>2</sub>.**

In this model, surface diffusions are mainly considered. During the growth, reactive Mo-/S- atoms/species reach to the substrate surface. Three processes are involved (Fig. S2a): 1) the adsorption on the surface; 2) the diffusion on the surface with a lifetime before de-adsorption; and 3) the desorption off the surface. The light element S desorbs easily off the surface at high growth temperatures (with very small  $\tau_S$ ); thus, we could mainly consider the kinetic behavior of Mo-atoms/species which dominates the growth, as confirmed from many previous results. The diffusion behavior of these reactive atoms/species is also surface dependent, e.g. between sapphire and MoS<sub>2</sub>. According to a control experiment shown in below Fig. S3, these reactive atoms/species are much more diffusive on MoS<sub>2</sub> than sapphire. Such high diffusivity can be attributed to the atomic smooth and dangling bonds free surfaces of the MoS<sub>2</sub> basal plane, and it will be even more significant when the substrate temperature is high (such as >1000 K). We also assume that, when  $N > 0$ , the diffusion behavior is  $N$ -independent under the same experimental conditions since all surfaces are of MoS<sub>2</sub>.

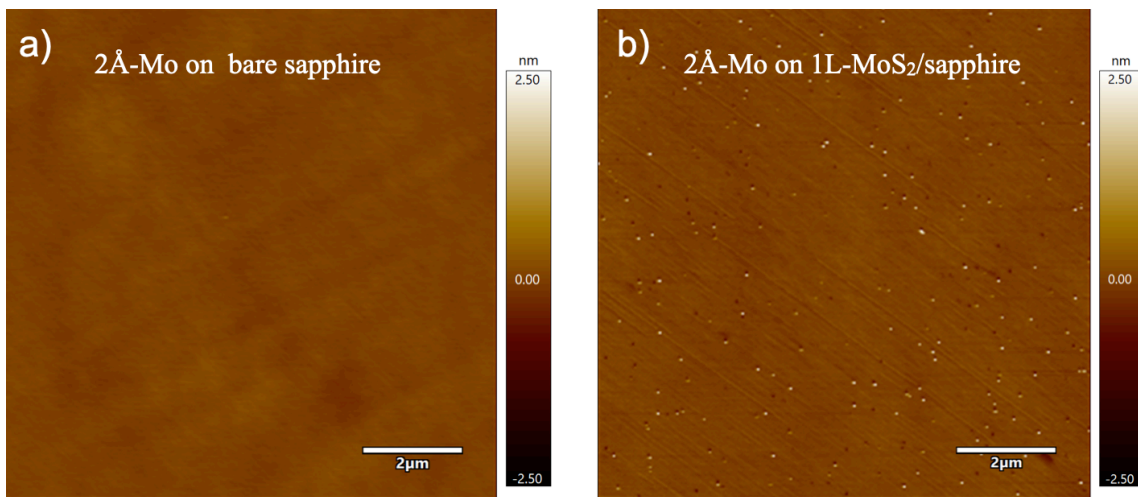

**Fig. S3 AFM images of 2Å-thick Mo on a) bare sapphire and b) 1L-MoS<sub>2</sub>/sapphire surfaces.** Both Mo-deposition and AFM imaging were performed at a room temperature. Results suggest that, even at room temperature, Mo atoms are very diffusive on the MoS<sub>2</sub> surface and aggregate into small particles. In contrast, Mo on sapphire surface is quite stable at room temperature.

A growth cycle of a complete  $(N+1)^{\text{th}}$ L is depicted in Fig. S2b, involving two steps. At the initial stage in step 1, Mo-/S- atoms/species meet on the surface of NL-MoS<sub>2</sub>/sapphire and react for  $(N+1)^{\text{th}}$ L nucleation. Here only monolayer nucleation is considered for simplicity (more discussions are given in the following Part-III). After the initial nucleation, the growth faces a balance between new nucleations and the edge growth. If the edge growth rate is too fast, those initial nuclei will

quickly grow and cover the entire substrate by domain-domain coalescence (step 2); in this case (defined as case 1), nucleations proceed over the entire growth cycle. Otherwise (defined as case 2), the density of surface nuclei would increase with time till reaching saturation. The saturation density is characterized by a critical nucleation time  $t_c$  after which the formation of new nuclei ceases (when the density of stable nuclei is high enough so that the nearby atoms/species would diffuse to existing nuclei rather than forming new ones). After the nucleation saturation, only the edge growth is present and eventually achieve layer completion by domain-domain coalescence (step 2). As will be discussed in the following Part-III, case 1/2 corresponds to the hetero-/homo-epitaxy process.

Obviously, the growth of an ideal 2D  $(N+1)^{\text{th}}\text{L}$  on  $N\text{L}$  requires that, during the edge growth, new nucleations on the growing  $(N+1)^{\text{th}}\text{L}$  domains are forbidden. This is equivalent to the statement that every atoms/species on  $(N+1)\text{L}$  domains must travel to their edges. This criterion can be satisfied if the diffusion mean free paths  $\lambda$  of those atoms/species on  $(N+1)\text{L}$  are larger than the domain sizes  $D$ , that is,  $\lambda > D$ . Note that  $D$  is equivalent to the neighboring nucleus-nucleus distance (marked in Fig. S2b), if these nuclei are uniform in sizes and spatial distributions.

### III: Optimizations of growth conditions for 2D growth in each layer

As discussed above, both nucleation and edge growth are determining kinetic processes during the layered growth of  $\text{MoS}_2$ . To achieve an ideal 2D layer-by-layer growth mode in each individual layers, the criteria are: 1) during nucleation, *only monolayer  $\text{MoS}_2$  nucleus are allowed*; 2) during edge growth (till layer completion),  $\lambda > D$ . The former criterion can be satisfied by using a high surface energy substrate, like sapphire in the present case, to tune the surface energies of  $\text{MoS}_2$  on its top, as suggested in Part-I. While the latter criterion can be satisfied by tuning the practical growth parameters, as will be discussed in details.

In this work, heteroepitaxy of  $1^{\text{st}}\text{L}$  on sapphire was grown via condition 1 and homoepitaxy of  $N^{\text{th}}\text{L}$  on  $(N-1)\text{L}$  with  $N \geq 2$  was grown via condition 2, as described in the manuscript. The difference between two conditions is that, in condition 2, temperatures of both Mo-source ( $T_{\text{Mo}}$ ) and substrate ( $T_{\text{substrate}}$ ) are elevated. All our growth were carried out via oxygen-assisted CVD at the low pressure of  $\sim 1$  Torr (Ar and  $\text{O}_2$  gas pressure) and the high  $T_{\text{substrate}} > 900$  °C by using large amount of S and tiny amount of  $\text{MoO}_3$  (i.e., S-rich atmosphere). Note that we have optimized the growth parameters previously<sup>7,8</sup> for  $1^{\text{st}}\text{L}$  on sapphire. It is also worth mentioning that, we firstly developed this oxygen-assisted CVD method and found that it is very efficient to achieve ultra-high edge growth rate of  $1\text{L-MoS}_2$  on sapphire, e.g.  $\sim 5\text{-}10$   $\mu\text{m}/\text{min}$ , compared to that less than  $\sim 0.1$   $\mu\text{m}/\text{min}$  without the oxygen assistance. This enhancement is attributed to the passivation of the  $\text{MoS}_2$  domain edges by oxygen, decreasing the reaction energy barrier during the kinetic growth process.

After the completion of  $1\text{L-MoS}_2/\text{sapphire}$ , we then tried to continue the next layer homoepitaxy. It turns out that, after  $1\text{L}$  completion, repeating condition 1 would yield small  $2\text{L}$  domains rather than a complete  $2\text{L}$  due to substrate changes, as shown in below Fig. S4a. It can also be seen that the as-grown triangular domains have nearly identical sizes, suggesting that the nucleation of  $2\text{L}$  has already reached the saturation. In order to improve the nucleation density, as well as the edge growth rate, we thus enhanced the Mo-flux by increasing  $T_{\text{Mo}}$ . A series of control experiments carried out at various  $T_{\text{Mo}}$  (while keeping other growth parameters the same) indeed show this strategy is effective, confirmed from the improved nucleation density of  $2^{\text{nd}}\text{L}$  on  $1\text{L}$  by  $\sim 4$  times from  $T_{\text{Mo}}=540$  °C to  $T_{\text{Mo}}=570$  °C (below Fig. S4b).

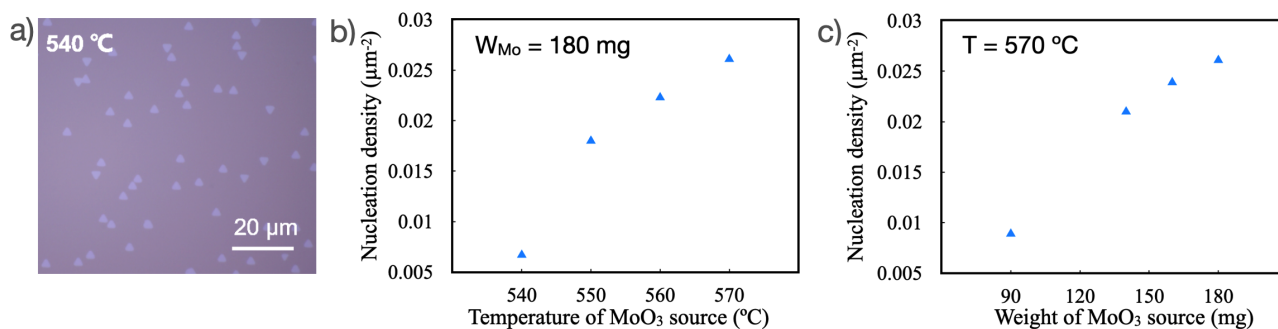

**Fig. S4 Nucleations of 2L on the complete 1L.** a) Optical image of a sample of 2L domains on a complete 1L grown by repeating the condition 1 for one time. b)/c) Nucleation density of 2L on a complete 1L tuned by the Mo-source temperature/weight. For samples shown in b)/c), only Mo-source temperatures/amounts were changed while the other growth parameters are the same as those in condition 1/2. From these data, we can see that the 30 °C increment of  $T_{Mo}$  has a similar effect to the doubled weight of  $W_{Mo}$  in terms of increasing the nucleation density. Since our growth runs are continuous, we thus adopted the Mo-source temperature increase strategy in all our growth.

Experimentally, we choose  $T_{Mo}=570$  °C,  $T_{substrate}=940$  °C for an optimized growth (condition 2). The 30 °C increase for  $T_{substrate}$  over condition 1 is used to balance the growth time. The time evolution of growth of a complete 2L-MoS<sub>2</sub>/sapphire is shown in the below Fig. S5). We can see that the 2D growth 1<sup>st</sup>L on sapphire is nearly perfect (Fig. S5a-b). Sizes of these triangular domains are very large, mostly over  $\sim 200$  μm, but with a certain size distribution. Both domain sizes and distributions suggest that the heteroepitaxy process follows case 1 mentioned in above Part-II.

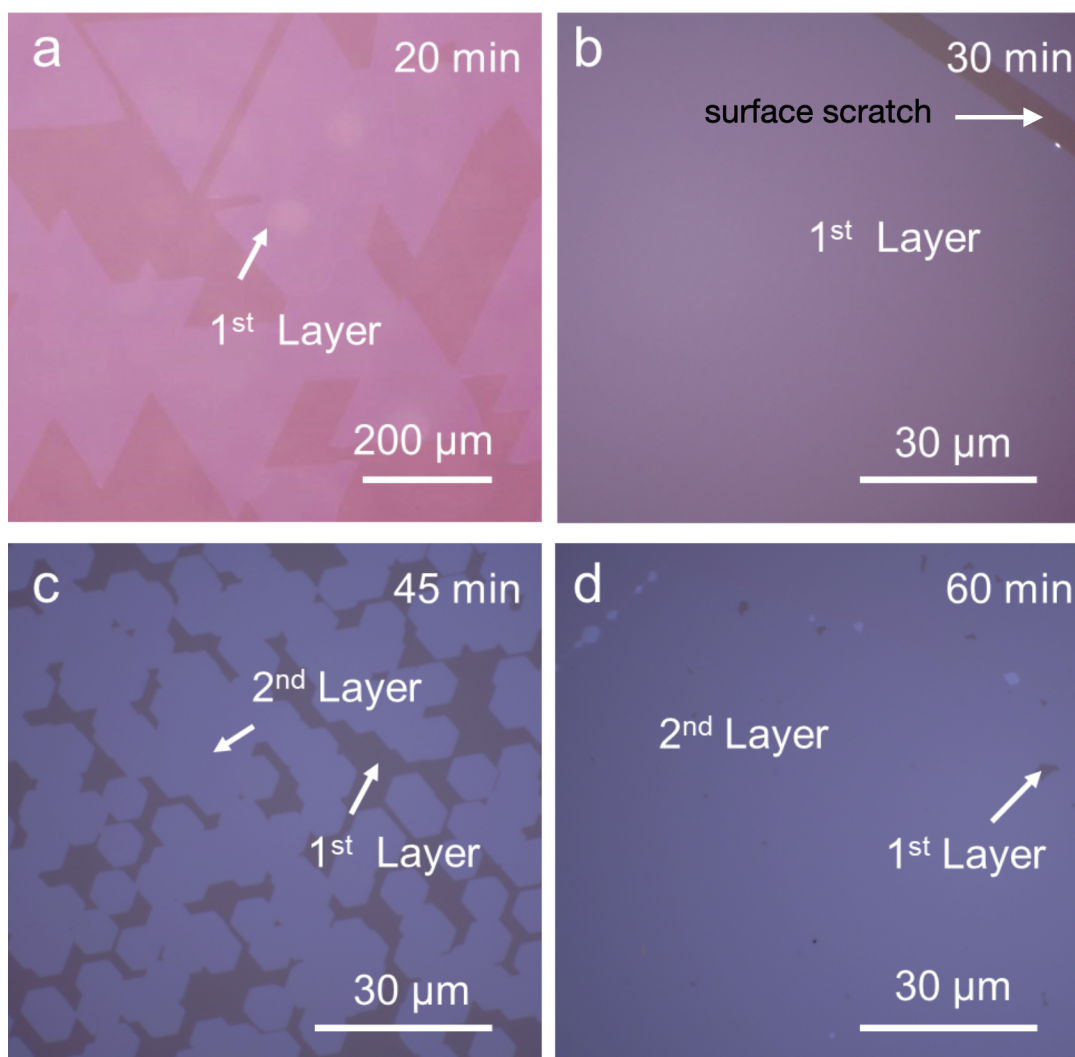

**Fig. S5 Time evolution of bilayer MoS<sub>2</sub> continuous film growth.** Optic images of 0.7L (a), 1L (b), 1.7L (c), and 2L (d) MoS<sub>2</sub> film. Decimals, e.g. 1.7, denotes fully covered first-layer with 70% coverage of the second-layer domains.

From Fig. S5c-d, we can also see that the 2D growth 2<sup>nd</sup>L-MoS<sub>2</sub> is also nearly perfect. The 2<sup>nd</sup>L nucleation distributes uniformly and sizes of these hexagonal domains are nearly identical at ~10 μm, suggesting that the homoepitaxy process follows case 2 mentioned in Part-II. Note that the shape of a domain is controlled by the specific edge (Mo-terminated or S-terminated) growth rate  $V$ , the hexagonal shape corresponds to  $V_{Mo} \approx V_{Mo}$  (otherwise it is triangular). Here, the hexagonal rather than triangular shapes are beneficial, as they are easier to be connected and coalesced for final layer completion. Besides, it is also noticed that the edge growth rate between heteroepitaxy ( $V_{hetero}$ ) and homoepitaxy ( $V_{homo}$ ) is significantly different, e.g.  $V_{hetero}$  of ~7 μm/min while  $V_{homo}$  of ~0.4 μm/min. This difference is attributed to the higher adsorption or lower desorption rate of Mo-atoms/species on sapphire surface, due to the existence of many dangling bonds.

Further repeating the growth by condition 2 thus yields 3L, 4L, and so on, on sapphire. As can be seen in Fig. 1 in the main manuscript, additional small 4L domains appear on the fully covered 3L, and the 3D growth tends to be more significant for even thicker layers. Based on the above analysis, we could understand this from two aspects. Firstly, the mean free path issue should be considered. For growth condition 2, the greater the Mo-flux, the shorter the  $\lambda_{Mo}$  on the MoS<sub>2</sub> surface is. As a consequence, the nucleation density and domain sizes need to be balanced. If  $\lambda > D$ , it leads to the 3D growth. Secondly, the monolayer nucleations on the thicker layer ( $N > 3$ ) tends to fail, as suggested by above thermodynamics analysis in Part-I.

#### IV: Summary of the Layer-by-layer growth process

Based on the above analysis together with the discussions in the main manuscript, we summarize key factors to achieve 2D growth of MoS<sub>2</sub>: 1) the surface proximity effect; 2) control of nucleation and edge growth in the kinetic growth process. The layer-by-layer growth flow chart for 1L, 2L, and 3L epitaxial growth in this work is given in below Fig. S6.

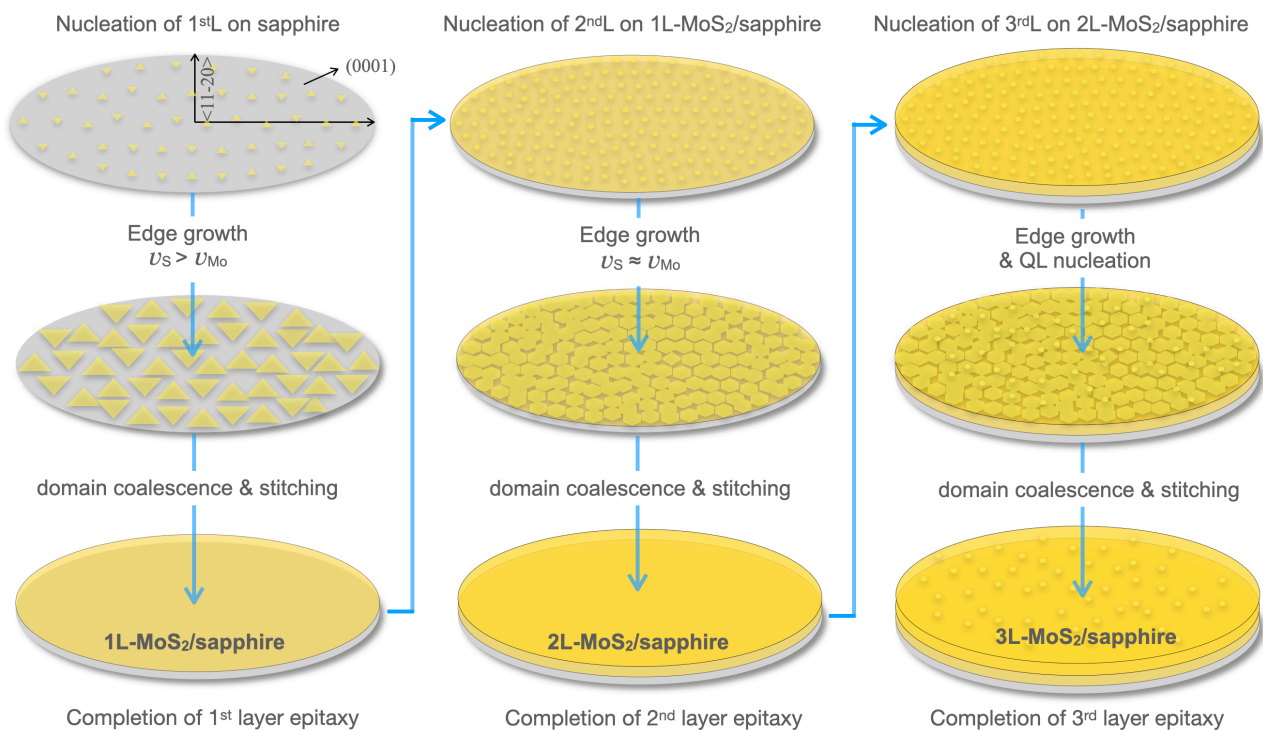

**Fig. S6 Illustration of the layer-by-layer growth process for ML-, BL-, and TL-MoS<sub>2</sub> continuous films on a 4-inch sapphire wafer.** Sapphire wafer crystallographic plane of (0001) and direction of <11-20> are marked by the black arrows.

## PART 2: Additional Characterization Data and Illustrations

### I: Uniformity of 2L nuclei

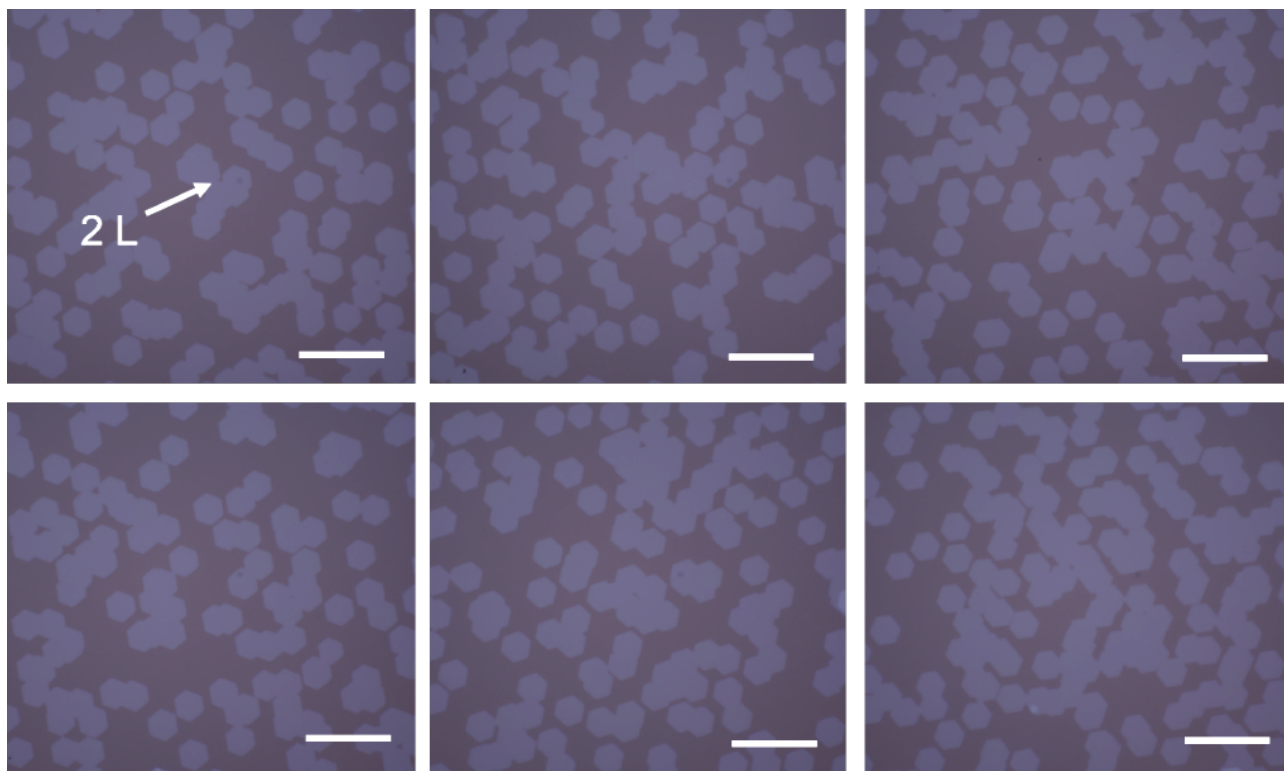

**Fig. S7 Homogeneous 2L nuclei on 1L at wafer scale.** Optic images of the second layer MoS<sub>2</sub> domains on monolayer taking from different locations across the entire 4-inch wafer. Scale bars, 20  $\mu\text{m}$ .

### II: Characterizations of multilayer 3L-, 4L- and 6L-MoS<sub>2</sub> films

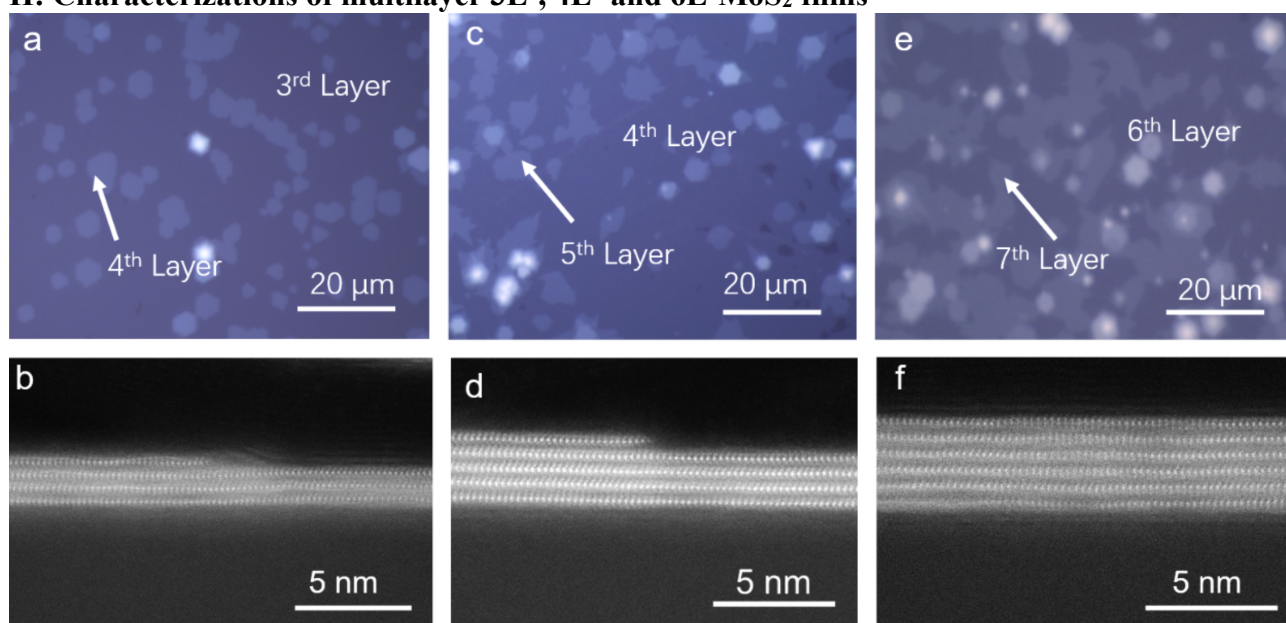

**Fig. S8 Optical images and cross-sectional STEM images of multilayer MoS<sub>2</sub> continuous films.** (a/b) 3L, (c/d) 4L, (e/f) 6L.



### III: Uniformity of a continuous 3L-MoS<sub>2</sub> at wafer scale

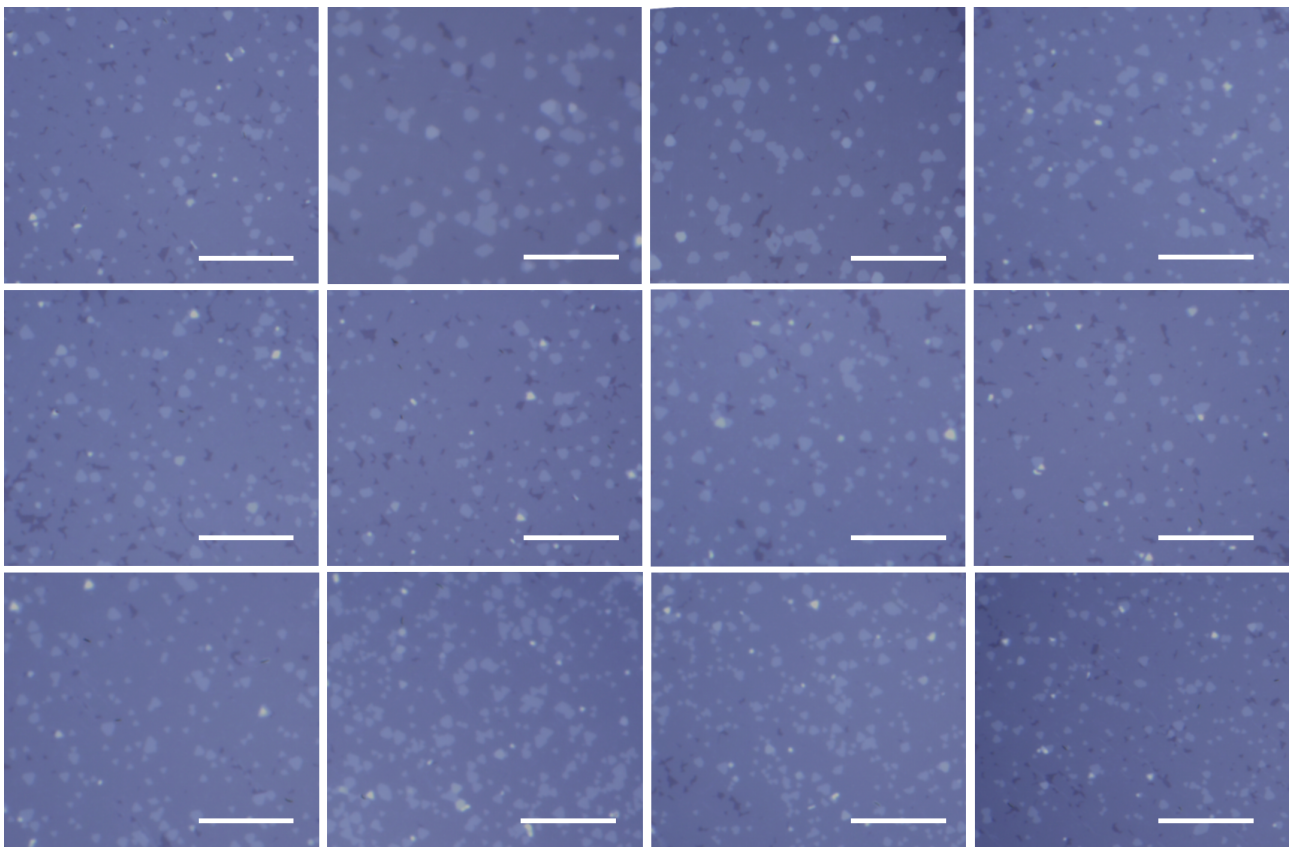

Fig. S9 Optic images of a as-grown 3L-MoS<sub>2</sub>/sapphire samples taking from many locations across the entire 4-inch wafer. Scale bars, 30  $\mu\text{m}$ .

### IV: Atomic configurations of the differently stacked trilayer MoS<sub>2</sub>

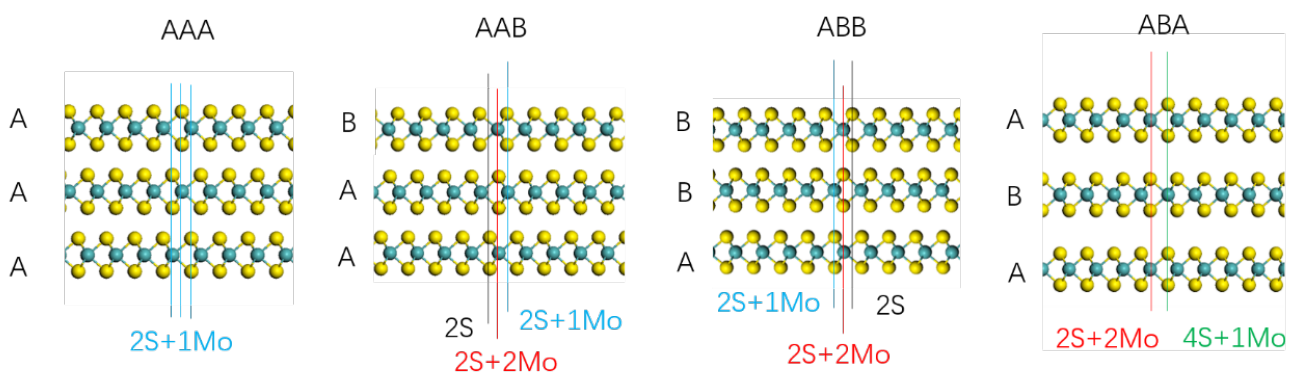

Fig. S10 Side view in ball-and-stick mode of the atomic structures of trilayer MoS<sub>2</sub> with different stacking orders AAA, AAB, ABB and ABA.

## V: SHG mapping of bilayer MoS<sub>2</sub> film

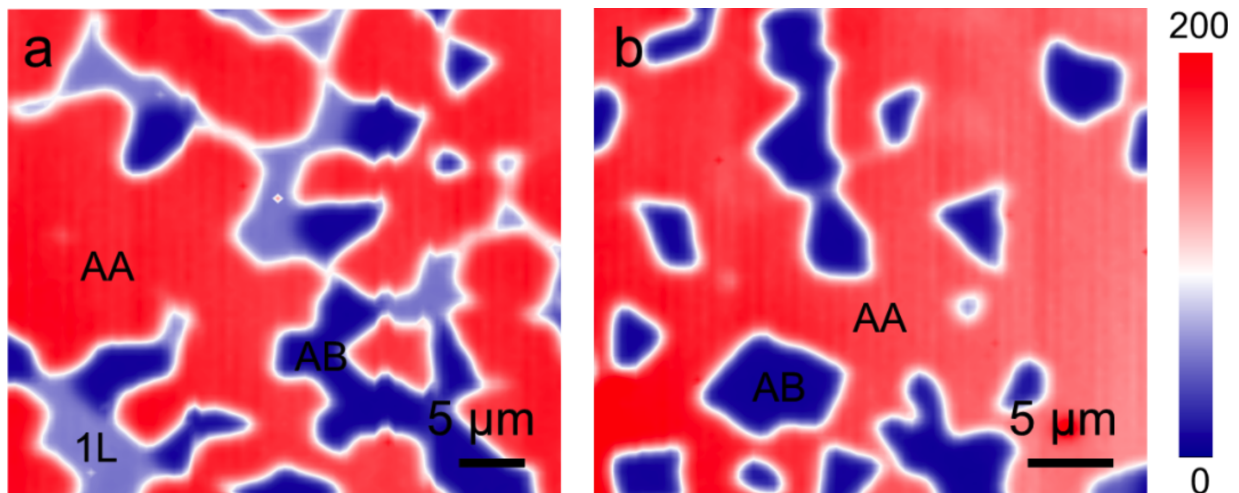

Fig. S11 (a)/(b) SHG mapping for a partially/fully completed bilayer MoS<sub>2</sub> film with/without discontinuous area within the 2<sup>nd</sup> layer. Note that the shape of domains in the 1<sup>st</sup> layer (triangular) and in the 2<sup>nd</sup> layer (hexagonal) are no longer recognized by SHG mapping due to the merging of domains.

## VI: Working flow of the device fabrication process

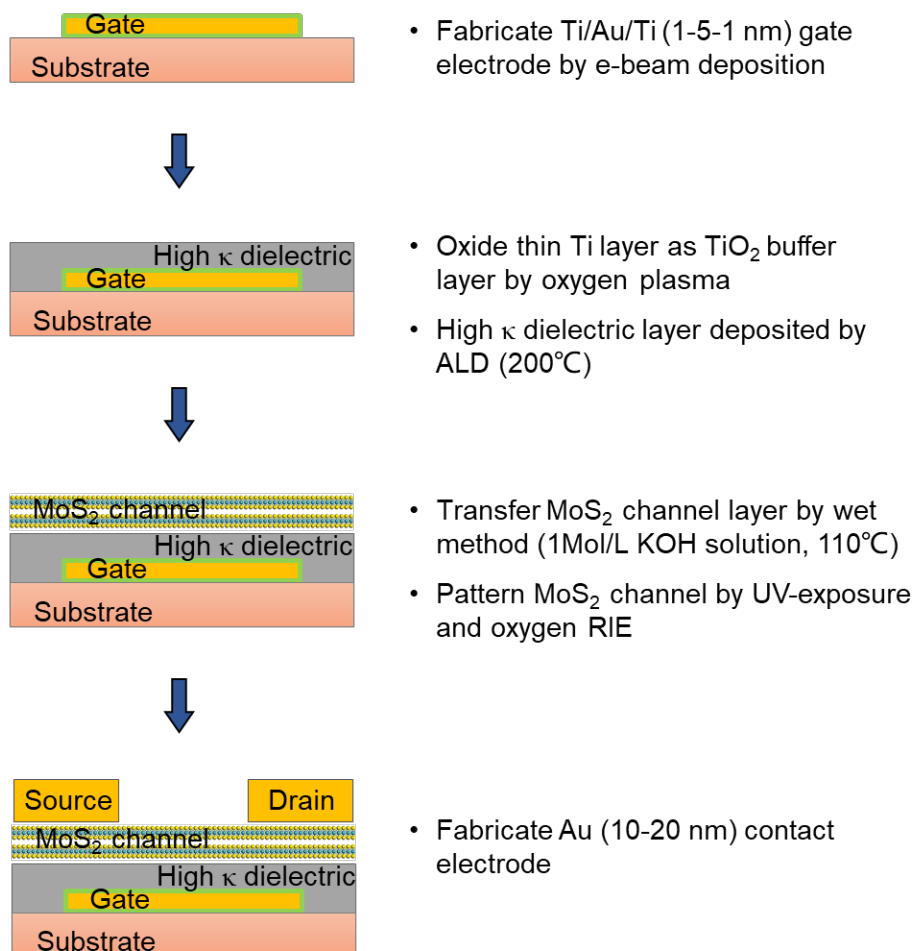

Fig. S12 Schematic illustration of the back-gated MoS<sub>2</sub> FET fabrication process.

## VII: Low-bias performance of the 40-nm short channel device

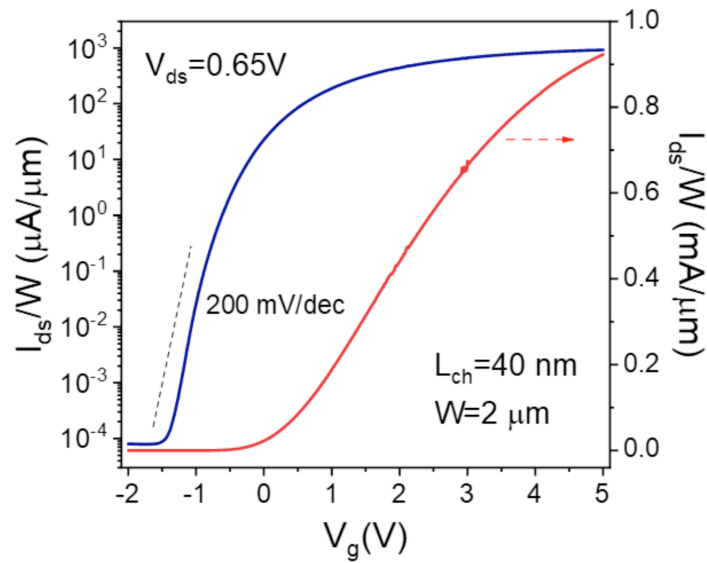

Fig. S13 Transfer curves of the 40-nm channel length device measure at  $V_{ds}=0.65$  V.

## VIII: Comparison of 1L-, 2L- and 3L-MoS<sub>2</sub> short channel devices

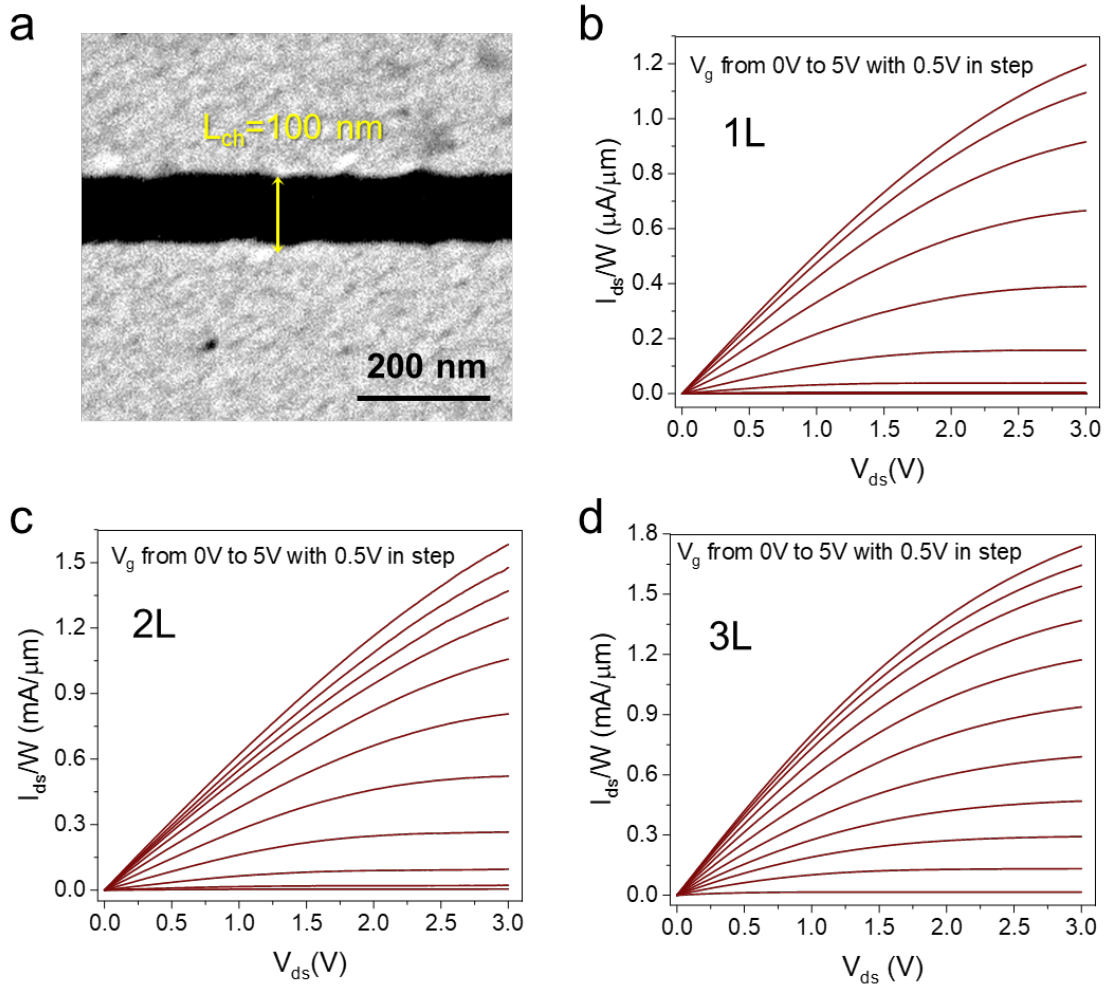

Fig. S14 Output curves of monolayer, bilayer and trilayer MoS<sub>2</sub> FETs at  $L_{ch}=100$  nm. (a) SEM image of MoS<sub>2</sub> FET with  $L_{ch}=100$  nm. (b) The output curves of monolayer MoS<sub>2</sub> FET. (c) The output curves of bilayer MoS<sub>2</sub> FET. (d) The output curves of trilayer MoS<sub>2</sub> FET.

### IX: Transfer curves of 1L- and 2L-MoS<sub>2</sub> FETs

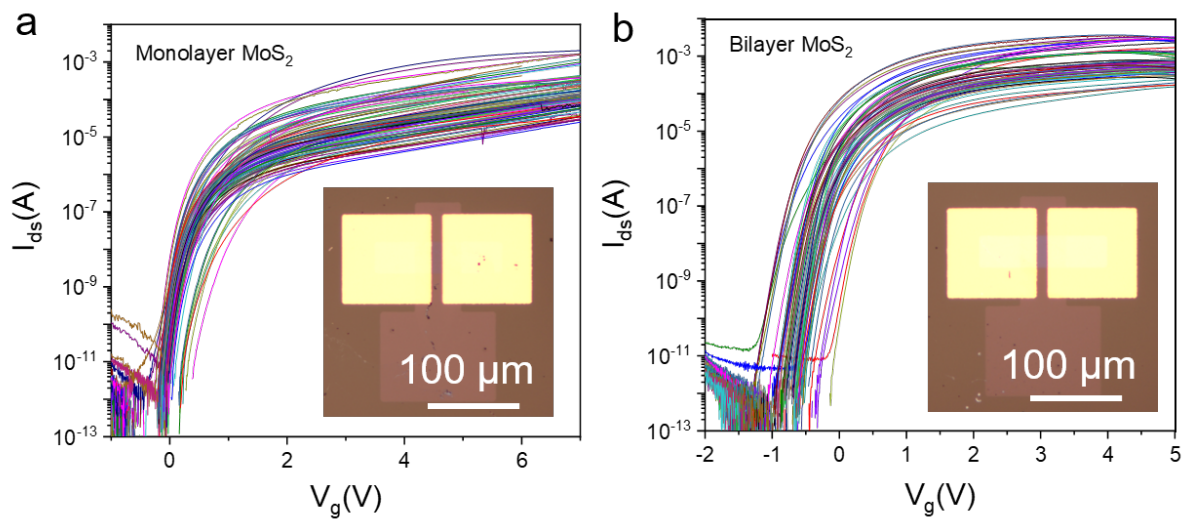

**Fig. S15** Transfer curves of 150 randomly picked 1L/2L MoS<sub>2</sub> FETs. Inset is the optic image of a typical device. Note that these 1L/2L MoS<sub>2</sub> FETs have channel length  $L_{ch}$  varying from 5  $\mu\text{m}$  to 50  $\mu\text{m}$  and channel width  $W_{ch}$  varying from 10  $\mu\text{m}$  to 30  $\mu\text{m}$ .

### X: Transfer curves of 3L-MoS<sub>2</sub> FETs

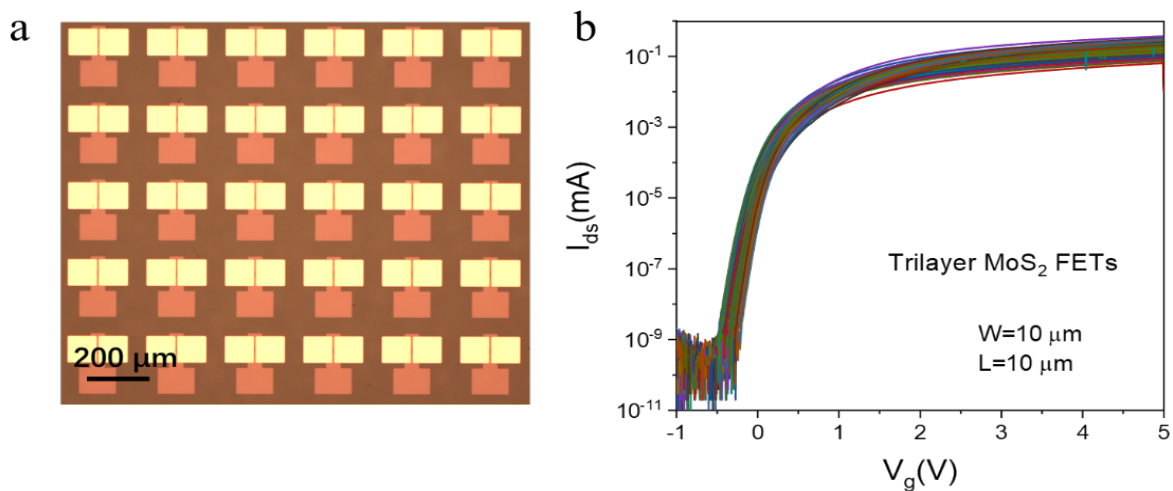

**Fig. S16** Transfer curves of 100 randomly picked 3L-MoS<sub>2</sub> FETs with same  $L_{ch}=10 \mu\text{m}$  and  $W_{ch}=10 \mu\text{m}$ . The zoom-in optic image of devices array is shown in (a).

## XI: Comparison of different approaches to produce MoS<sub>2</sub> multilayers

**Table 1. Multilayer flakes**

| Method        | Number of layers | Flake size    | Electron Mobility | On/Off ratio    | References |
|---------------|------------------|---------------|-------------------|-----------------|------------|
| Sulfurization | 1L - 4 L         | 10 μm         | 0.1-0.7           | 10 <sup>6</sup> | Ref. 9     |
| CVD           | 1L - N L         | ~50 μm        | 20-67             | 10 <sup>6</sup> | Ref. 10    |
| CVD           | 2L               | ~200 μm       | 36                | 10 <sup>7</sup> | Ref. 11    |
| CVD           | 2L               | ~20 μm        | 21                | 10 <sup>7</sup> | Ref. 12    |
| CVD           | 1L - 5L          | ~100 μm       | /                 | 10 <sup>7</sup> | Ref. 13    |
| CVD           | 2L               | 100-300 μm    | 7-75              | 10 <sup>4</sup> | Ref. 14    |
| CVD           | 2L               | 20-30 μm      | 32.6              | 10 <sup>7</sup> | Ref. 15    |
| CVD           | 2L               | (Nanoribbons) | 4                 | 10 <sup>4</sup> | Ref. 16    |

**Table 2. Multilayer films**

| Method                              | Film thickness | Film size | Domain alignment | Domain size | Electron Mobility | On/Off ratio    | References |
|-------------------------------------|----------------|-----------|------------------|-------------|-------------------|-----------------|------------|
| Sulfurization                       | 1.8-2.0 nm     | 2 inch    | random           | /           | ~0.8              | 10 <sup>5</sup> | Ref. 17    |
| Sulfurization                       | 1L - fewL      | ~ 1cm     | random           | <100 nm     | <0.04             | /               | Ref. 18    |
| Sulfurization                       | ~2 nm          | ~5 cm     | random           | /           | <10               | 10 <sup>5</sup> | Ref. 19    |
| Sulfurization                       | 3-4 nm         | 4 inch    | random           | 5-7 nm      | ~3.74             | /               | Ref. 20    |
| CVD on SiO <sub>2</sub>             | 1L/2L/3 L      | ~2 cm     | random           | /           | 3.6/8.2/15.6      | 10 <sup>6</sup> | Ref. 21    |
| ALD on SiO <sub>2</sub> or sapphire | ~3 nm          | 2 inch    | random           | /           | ~0.56             | 10 <sup>6</sup> | Ref. 22    |

CVD  
on sapphire  
(LBL  
epitaxy)    1L/2L/3L    4 inch    aligned    ~200/10/10  $\mu\text{m}$   
@ 1L/2L/3L    ~80/110/14  
5 @ 1L/2L/  
3L     $10^8$ - $10^9$     This work

---

## XII: Comparison of RT performances of various MoS<sub>2</sub> FETs

**Table S3:**

| Layer number | Channel length ( $L_{\text{ch}}$ ) | On/off ratio                       | $I_{\text{ds}}/W$ @ $V_{\text{ds}}=1\text{V}$ ( $\mu\text{A}/\mu\text{m}$ ) | $I_{\text{on max}}$ ( $\mu\text{A}/\mu\text{m}$ )/ $V_{\text{ds}}$ (V) | Mobility ( $\text{cm}^2\text{V}^{-1}\text{s}^{-1}$ ) | References       |
|--------------|------------------------------------|------------------------------------|-----------------------------------------------------------------------------|------------------------------------------------------------------------|------------------------------------------------------|------------------|
| 1L           | 35 nm                              | $10^6$                             | 840                                                                         | 1135/1.5                                                               | 22                                                   | Ref. 23          |
| 1L           | 82 nm                              | $4 \cdot 10^3$                     | 466                                                                         | /                                                                      | 23.2                                                 | Ref. 24          |
| 1L           | 112 nm                             | $2 \cdot 10^6$                     | 229                                                                         | 303/1.4                                                                | 8.1                                                  | Ref. 24          |
| 1L           | 380 nm                             | $10^6$                             | 280                                                                         | 700/5                                                                  | 33.5                                                 | Ref. 25          |
| 1L           | 10 nm                              | $5 \cdot 10^7$                     | 190                                                                         | 540/3.5                                                                | 30                                                   | Ref. 26          |
| 6L           | 100 nm                             | $6.3 \cdot 10^5$                   | 350                                                                         | 460/1.6                                                                | 50                                                   | Ref. 27          |
| 4L           | 35 nm                              | $10^8$                             | 250                                                                         | /                                                                      | 4                                                    | Ref. 28          |
| 1L           | 50 nm                              | $10^8$                             | 156                                                                         | 250/1.6                                                                | 20                                                   | Ref. 29          |
| 6L           | 80 nm                              | $6 \cdot 10^5$                     | 640                                                                         | 830/2                                                                  | 51                                                   | Ref. 30          |
| 5L           | 100 nm                             | $10^7$                             | 350                                                                         | 510/3                                                                  | /                                                    | Ref. 31          |
| 8L           | 100 nm                             | $10^8$                             | 45                                                                          | 87/2                                                                   | 20                                                   | Ref. 32          |
| 2L           | 250 nm                             | $10^7$                             | 12                                                                          | 28/2.5                                                                 | /                                                    | Ref. 33          |
| 1L           | 500 nm                             | $10^9$                             | 140                                                                         | 450/6                                                                  | 77.6                                                 | Ref. 34          |
| 2L           | 1000 nm                            | $10^7$                             | 23                                                                          | /                                                                      | 15                                                   | Ref. 35          |
| 3L           | 1200 nm                            | $10^8$                             | 85                                                                          | /                                                                      | 46                                                   | Ref. 36          |
| 1L           | 1900 nm                            | $10^{10}$                          | 11                                                                          | 44/4                                                                   | /                                                    | Ref. 37          |
| 16L          | 5000 nm                            | $10^7$                             | 60                                                                          | 240/5                                                                  | /                                                    | Ref. 38          |
| 1L           | 6000 nm                            | $10^{10}$                          | 13                                                                          | 35/3                                                                   | 55                                                   | Ref. 39          |
| 2L           | 40 nm                              | $10^6$                             | 300                                                                         | 427/2                                                                  | 30                                                   | Ref. 40          |
| 1L           | 2000 nm                            | $2 \cdot 10^6$                     | 18                                                                          | /                                                                      | 167                                                  | Ref. 41          |
| <b>1L</b>    | <b>100 nm</b>                      | <b><math>7.2 \cdot 10^8</math></b> | <b>402.17</b>                                                               | <b>1195.5/3</b>                                                        | <b>80</b>                                            | <b>This work</b> |

|    |        |                    |        |          |     |           |
|----|--------|--------------------|--------|----------|-----|-----------|
| 2L | 100 nm | $2.27 \times 10^8$ | 641.67 | 1579.8/3 | 110 | This work |
| 3L | 100 nm | $6.76 \times 10^7$ | 804.7  | 1738.7/3 | 145 | This work |
| 3L | 40 nm  | $1.5 \times 10^7$  | 1221.9 | 1704.6/2 | 145 | This work |

---

### **PART 3: References**

1. Bauer, E., & van der Merwe, J. H. Structure and growth of crystalline superlattices: From monolayer to superlattice. *Phys. Rev. B* **33**, 3657, (1986).
2. Shang, S. L., Lindwall, G., Wang, Y., Redwing, J. M., Anderson, T., & Liu, Z. K. Lateral versus vertical growth of two-dimensional layered transition-metal dichalcogenides: thermodynamic insight into MoS<sub>2</sub>. *Nano letter*. **16**, 5742-5750, (2016).
3. Bakholdin, S. I., & Maslov, V. N. Simulation of surface energies of sapphire crystals. *Physics of the Solid State* **57**, 1236-1243, (2015).
4. Kresse, G. & Furthmüller, J. Efficient iterative schemes for ab initio total-energy calculations using a plane-wave basis set. *Phys. Rev. B* **54**, 11169, (1996).
5. Blöchl, P. E. Projector augmented-wave method. *Phys. Rev. B* **50**, 17953, (1994).
6. Perdew, J. P., Burke, K. & Ernzerhof, M. Generalized gradient approximation made simple. *Phys. Rev. Lett.* **77**, 3865, (1996).
7. Yu, H., Liao, M., Zhao, W., Liu, G., Zhou, X. J., Wei, Z., et. al., Wafer-scale growth and transfer of highly-oriented monolayer MoS<sub>2</sub> continuous films. *ACS nano* **11**, 12001-12007, (2017).
8. Wang, Q., Li, N., Tang, J., Zhu, J., Zhang, Q., Jia, Q., et. al., Wafer-scale highly oriented monolayer MoS<sub>2</sub> with large domain sizes. *Nano Letter*. **20**, 7193-7199, (2020).
9. Wang, X., Feng, H., Wu, Y., & Jiao, L. Controlled synthesis of highly crystalline MoS<sub>2</sub> flakes by chemical vapor deposition. *J. Am. Chem. Soc.* **135**, 5304-5307, (2013).
10. Zheng, J., Yan, X., Lu, Z., Qiu, H., Xu, G., Zhou, X., et. al, High-mobility multilayered MoS<sub>2</sub> flakes with low contact resistance grown by chemical vapor deposition. *Adv. Mater.* **29**, 1604540, (2017).
11. Gao, Q., Zhang, Z., Xu, X., Song, J., Li, X., & Wu, Y. Scalable high performance radio frequency electronics based on large domain bilayer MoS<sub>2</sub>. *Nat. Commun.* **9**, 1-8, (2018).
12. Fang, M., Wang, F., Han, Y., Feng, Y., Ren, T., Li, Y., et. al, Controlled growth of bilayer-MoS<sub>2</sub> films and MoS<sub>2</sub>-based field-effect transistor (FET) performance optimization. *Adv. Electron. Mater.*, **4**, 1700524, (2018).
13. Yang, P., Zhang, Z., Sun, M., Lin, F., Cheng, T., Shi, J., et. al, Thickness tunable wedding-cake-like MoS<sub>2</sub> flakes for high-performance optoelectronics. *ACS nano*, **13**, 3649-3658, (2019).
14. Zhang, X., Nan, H., Xiao, S., Wan, X., Gu, X., Du, A., et. al, Transition metal dichalcogenides bilayer single crystals by reverse-flow chemical vapor epitaxy. *Nat. Commun.* **10**, 1-10, (2019).
15. Li, B., Ju, Q., Hong, W., Cai, Q., Lin, J., & Liu, W. Edge defect-assisted synthesis of chemical vapor deposited bilayer molybdenum disulfide. *Ceramics International* **47**, 30106-30112, (2021).
16. Li, X., Li, B., Lei, J., Bets, K. V., Sang, X., Okogbue, E., et. al, Nickel particle-enabled width-controlled growth of bilayer molybdenum disulfide nanoribbons. *Science Advances* **7**, eabk1892, (2021).
17. Lin, Y. C., Zhang, W., Huang, J. K., Liu, K. K., Lee, Y. H., Liang, C. T., et. al, Wafer-scale MoS<sub>2</sub> thin layers prepared by MoO<sub>3</sub> sulfurization. *Nanoscale* **4**, 6637-6641. (2012).
18. Zhan, Y., Liu, Z., Najmaei, S., Ajayan, P. M., & Lou, J. Large-area vapor-phase growth and characterization of MoS<sub>2</sub> atomic layers on a SiO<sub>2</sub> substrate. *Small* **8**, 966-971, (2012).
19. Liu, K. K., Zhang, W., Lee, Y. H., Lin, Y. C., Chang, M. T., Su, C. Y., et. al, Growth of large-area and highly crystalline MoS<sub>2</sub> thin layers on insulating substrates. *Nano letter*. **12**, 1538-1544, (2012).
20. Ahn, C., Lee, J., Kim, H. U., Bark, H., Jeon, M., Ryu, G. H., et. al, Low-temperature synthesis



- of large-scale molybdenum disulfide thin films directly on a plastic substrate using plasma-enhanced chemical vapor deposition. *Adv. Mater.* **27**, 5223-5229, (2015).
21. Jeon, J., Jang, S. K., Jeon, S. M., Yoo, G., Jang, Y. H., Park, J. H., & Lee, S. Layer-controlled CVD growth of large-area two-dimensional MoS<sub>2</sub> films. *Nanoscale* **7**, 1688-1695, (2015).
  22. Liu, H., Chen, L., Zhu, H., Sun, Q. Q., Ding, S. J., Zhou, P., & Zhang, D. W. Atomic layer deposited 2D MoS<sub>2</sub> atomic crystals: From material to circuit. *Nano Research* **13**, 1644-1650, (2020).
  23. Shen, P.-C. *et al.* Ultralow contact resistance between semimetal and monolayer semiconductors. *Nature* **593**, 211-217, (2021).
  24. Daus, A. *et al.* High-performance flexible nanoscale transistors based on transition metal dichalcogenides. *Nat. Electron.* **4**, 495-501, (2021).
  25. McClellan, C. J., Yalon, E., Smithe, K. K. H., Suryavanshi, S. V. & Pop, E. High Current Density in Monolayer MoS<sub>2</sub> Doped by AlO<sub>x</sub>. *ACS Nano* **15**, 1587-1596, (2021).
  26. Xie, L. *et al.* Graphene-Contacted Ultrashort Channel Monolayer MoS<sub>2</sub> Transistors. *Adv. Mater.* **29**, 1702522, (2017).
  27. Yang, L. *et al.* High-Performance MoS<sub>2</sub> Field-Effect Transistors Enabled by Chloride Doping Record low contact resistance (0.5k $\Omega$ ) and record high drain current 460  $\mu$ A  $\cdot$   $\mu$ m<sup>-1</sup>. *2014 Symposium on VLSI Technology (VLSI-Technology): Digest of Technical Papers*, 1-2, (2014).
  28. Smets, Q. *et al.* Ultra-scaled MOCVD MoS<sub>2</sub> MOSFETs with 42 nm contact pitch and 250  $\mu$ A/ $\mu$ m drain current. *2019 IEEE International Electron Devices Meeting (IEDM)*, 23.2.1-23.2.4, (2019).
  29. Zhu, Y. *et al.* Monolayer Molybdenum Disulfide Transistors with Single-Atom-Thick Gates. *Nano Lett.* **18**, 3807-3813, (2018).
  30. Liu, Y. *et al.* Pushing the Performance Limit of Sub-100 nm Molybdenum Disulfide Transistors. *Nano Lett.* **16**, 6337-6342, (2016).
  31. Si, M. *et al.* Steep-slope hysteresis-free negative capacitance MoS<sub>2</sub> transistors. *Nat. Nanotechnol.* **13**, 24-28, (2018).
  32. Liu, H., Neal, A. T. & Ye, P. D. Channel length scaling of MoS<sub>2</sub> MOSFETs. *ACS Nano* **6**, 8563-8569, (2012).
  33. Desai, S. B. *et al.* MoS<sub>2</sub> transistors with 1-nanometer gate lengths. *Science* **354**, 99-102, (2016).
  34. Li, T. *et al.* Epitaxial growth of wafer-scale molybdenum disulfide semiconductor single crystals on sapphire. *Nat. Nanotechnol.* (2021). <https://doi.org/10.1038/s41565-021-00963-8>.
  35. Wang, H. *et al.* Integrated circuits based on bilayer MoS<sub>2</sub> transistors. *Nano Lett.* **12**, 4674-4680, (2012).
  36. Kappera, R. *et al.* Phase-engineered low-resistance contacts for ultrathin MoS<sub>2</sub> transistors. *Nat. Mater.* **13**, 1128-1134, (2014).
  37. Zheng, X. *et al.* Patterning metal contacts on monolayer MoS<sub>2</sub> with vanishing Schottky barriers using thermal nanolithography. *Nat. Electron.* **2**, 17-25, (2019).
  38. Das, S., Chen, H. Y., Penumatcha, A. V. & Appenzeller, J. High performance multilayer MoS<sub>2</sub> transistors with scandium contacts. *Nano Lett.* **13**, 100-105, (2013).
  39. Li, N. *et al.* Large-scale flexible and transparent electronics based on monolayer molybdenum disulfide field-effect transistors. *Nat. Electron.* **3**, 711-717, (2020).
  40. Gao, Q. *et al.* Scalable high performance radio frequency electronics based on large domain bilayer MoS<sub>2</sub>. *Nat. Commun.* **9**, 4778, (2018).
  41. Wang, Y. *et al.* Van der Waals contacts between three-dimensional metals and two-dimensional semiconductors. *Nature* **568**, 70-74, (2019).
